# Supplementary material
Source: PubMed Central journal article supplement (PMC2909321)

**A**FAM29A Peptides Identified in the Plk1 Complex

SDPFQKEQDHLVEEVAR (XCorr 3.3/DeltCN 0.35)

NTESSAFGGSLPAK (4.5/0.32)

WKEFLGLSPFSLIK (3.6/0.18)

EVLPESLPVLHNQR (2.9/0.31)

IDVMGGSEEEFMK (3.7/0.34)

SECIGLENQIK (2.8/0.32)

LTVDLHYLEK (3.0/0.21)

YQENAQLSVK (2.5/0.20)

IKDDLTTIR (3.1/0.17)

**B**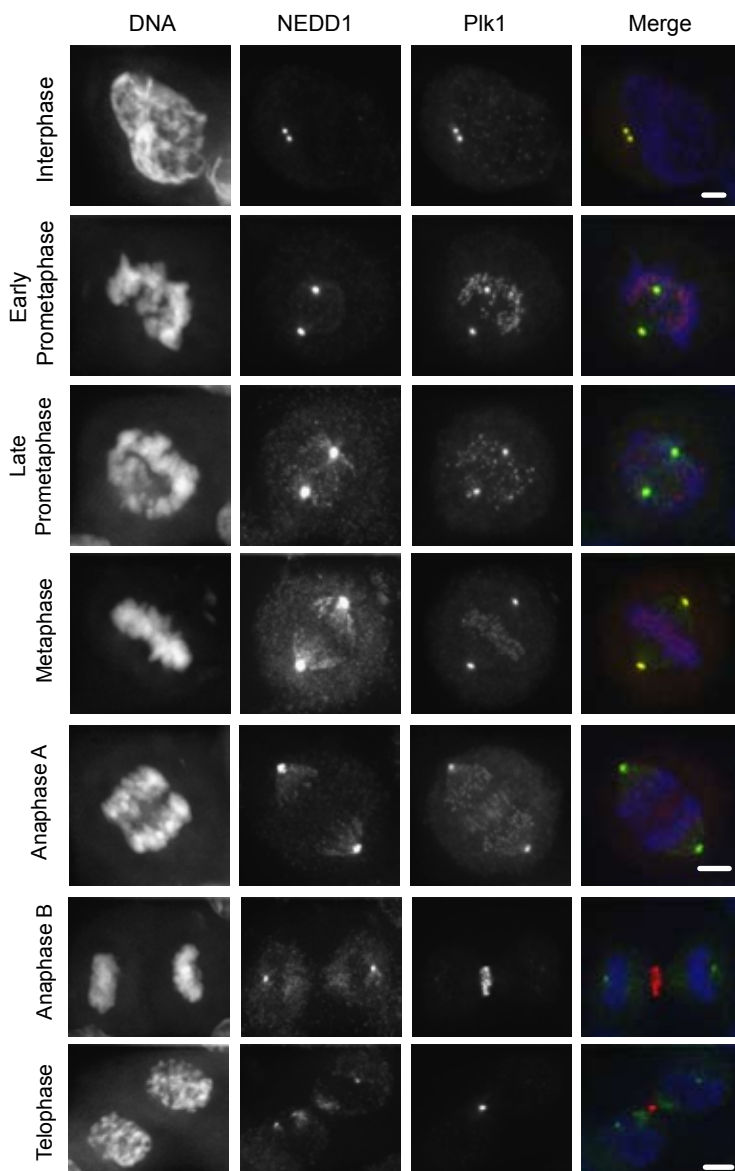

Supplement: supp_122_15_2750__1.pdf [file supp_122_15_2750__1.pdf]
