# Supplementary material
Source: PubMed Central journal article supplement (PMC2909321)

A

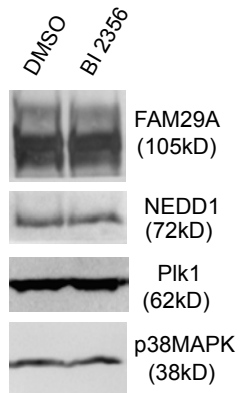

B

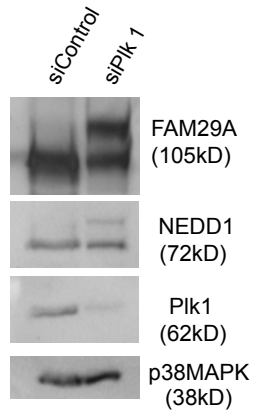

Supplement: supp_122_15_2750__2.pdf [file supp_122_15_2750__2.pdf]
